# Supplementary material
Source: PubMed Central journal article supplement (PMC3043647)

Supplemental Figure 1

Normal Liver

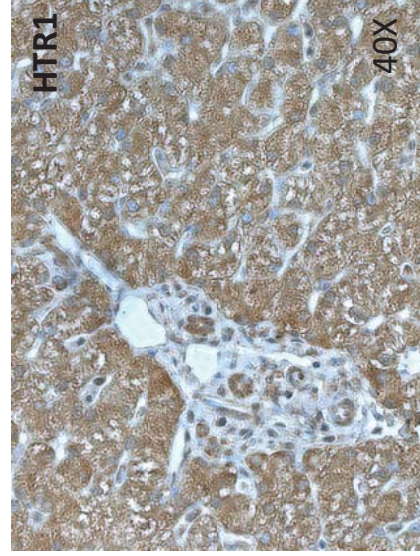

PBC

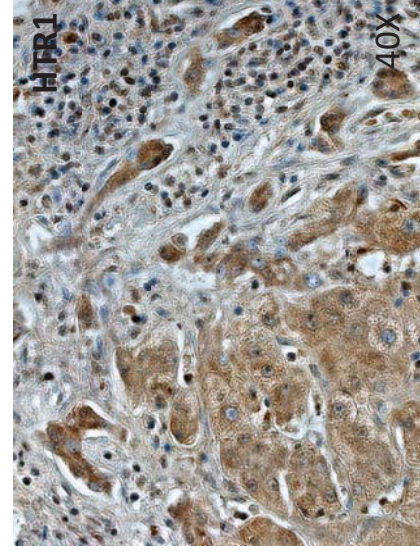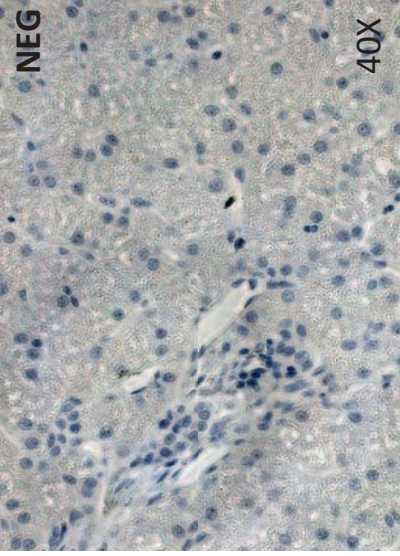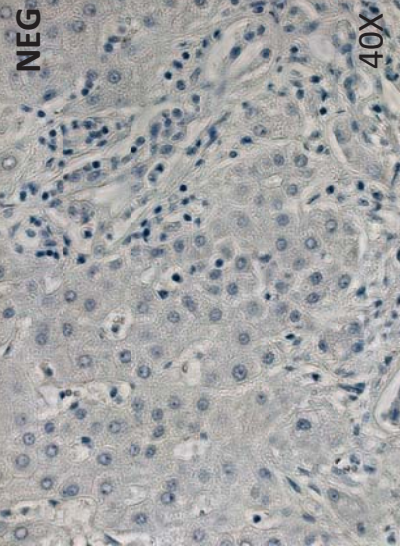

Supplement: supp_00368.2010_figS1.pdf [file supp_00368.2010_figS1.pdf]

Supplemental Figure 2

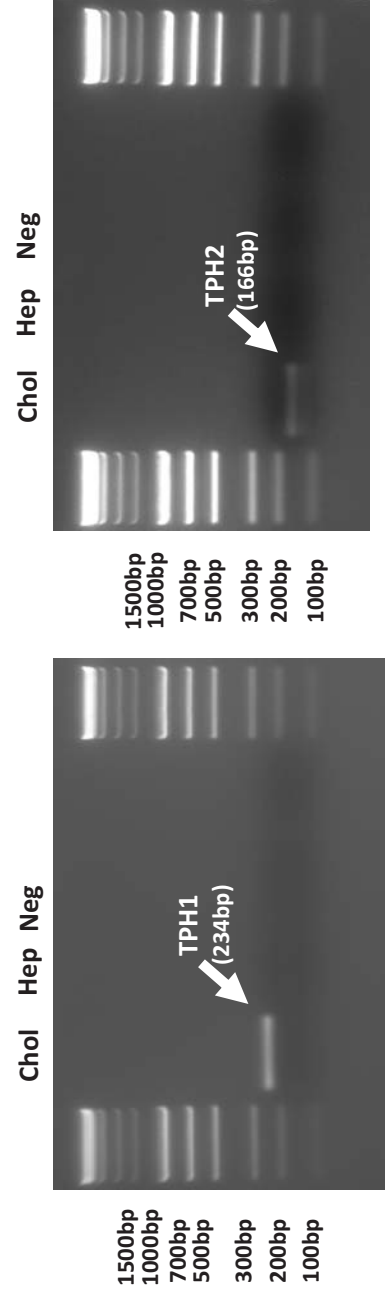

Supplement: supp_00368.2010_figS2.pdf [file supp_00368.2010_figS2.pdf]

Supplemental Figure 3

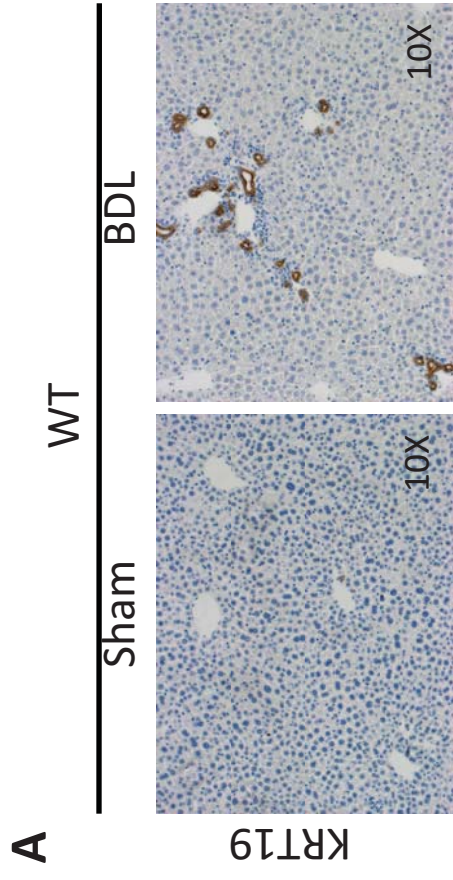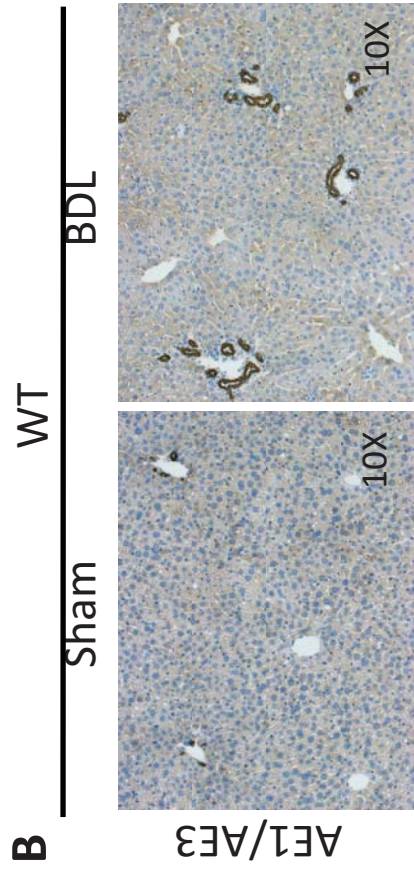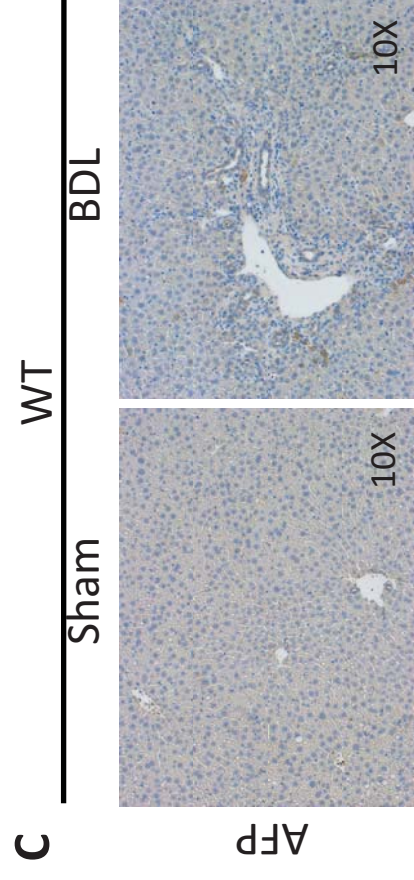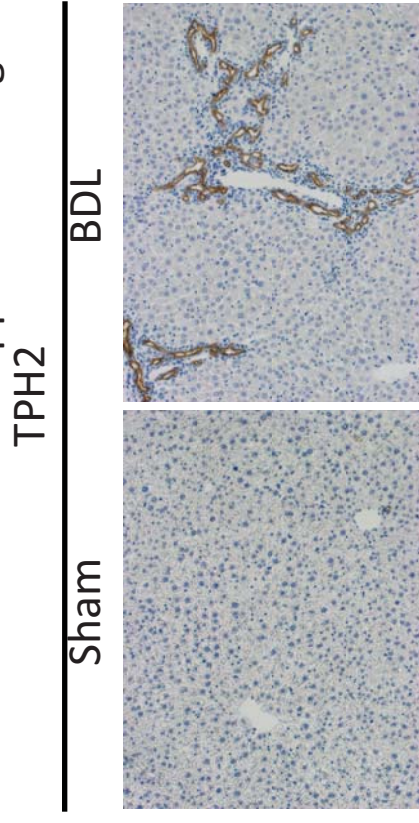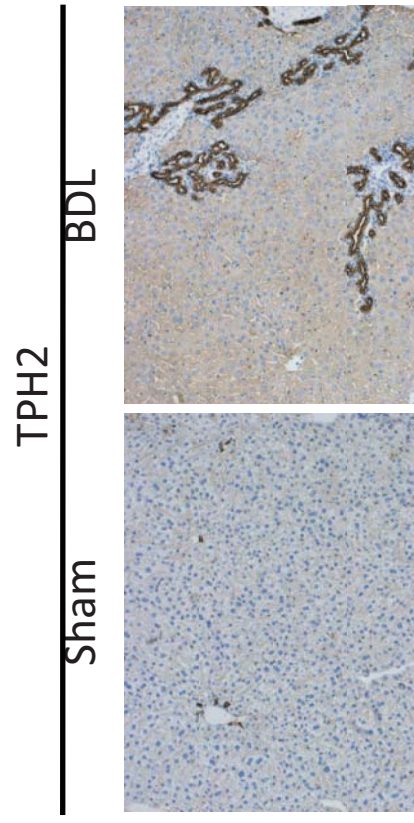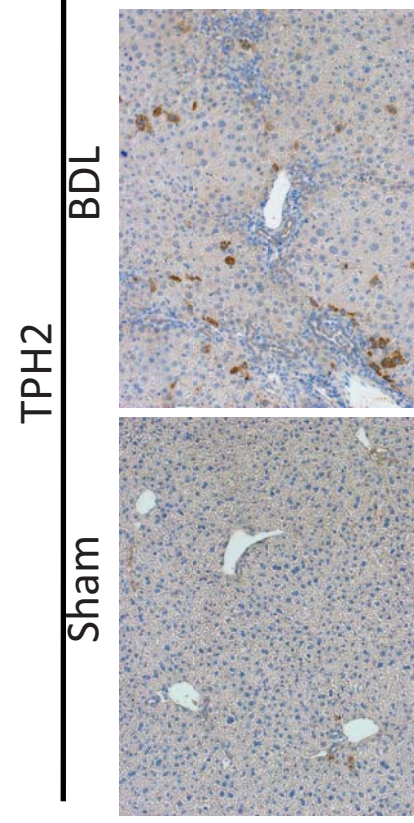

Supplement: supp_00368.2010_figS3.pdf [file supp_00368.2010_figS3.pdf]

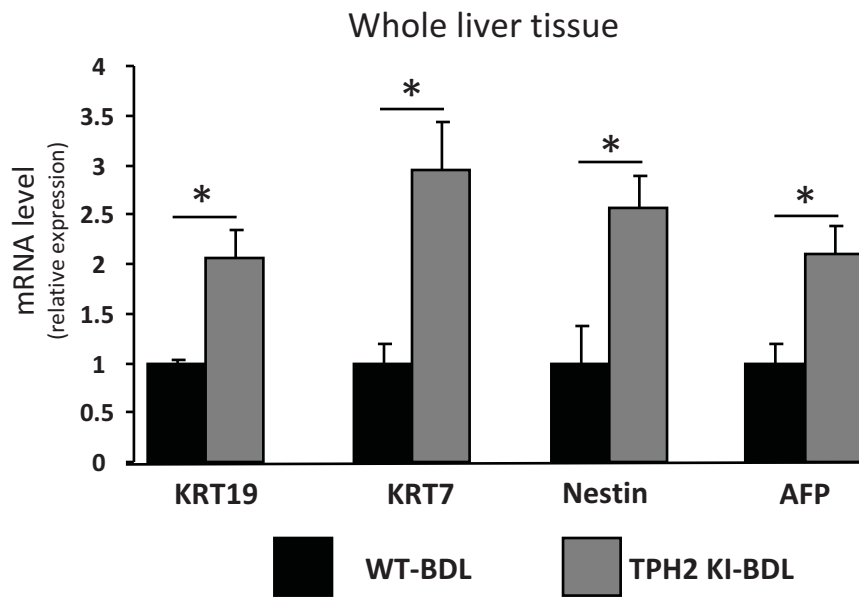

Supplement: supp_00368.2010_figS4.pdf [file supp_00368.2010_figS4.pdf]

# Supplemental Figure 5

Whole liver tissue

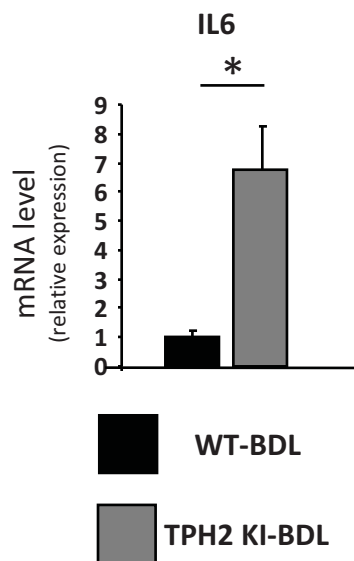

Supplement: supp_00368.2010_figS5.pdf [file supp_00368.2010_figS5.pdf]
